# Supplementary material for: A novel diagnostic protocol to identify patients suitable for discharge after a single high-sensitivity troponin
Source: HighWire-hosted journal article supplement (doi:10.1136/heartjnl-2014-307288), 2015-02-17
Supplement: heartjnl-2014-307288supp.pdf [file heartjnl-2014-307288supp.pdf]

## Supplementary Appendix

Diagnoses of patients with at least one high-sensitivity troponin T result above the 99<sup>th</sup> percentile adjudicated to have a non-ischaemic cause of troponin elevation.

|                                                          | Number (%) | Mean Presentation high-sensitivity troponin T (ng/L) (+/- Standard Deviation) |
|----------------------------------------------------------|------------|-------------------------------------------------------------------------------|
| <b>Injury related to supply/demand imbalance</b>         |            |                                                                               |
| Tachy-arrhythmias                                        | 6 (0.6)    | 27.3 (10.2)                                                                   |
| Hypovolaemia/Sepsis                                      | 7 (0.7)    | 26.8 (14.3)                                                                   |
| Severe aortic valve disease                              | 1 (0.1)    | 41.0 (n/a)                                                                    |
| Respiratory failure/pneumonia                            | 6 (0.6)    | 18.8 (4.4)                                                                    |
| <b>Injury not related to myocardial ischaemia</b>        |            |                                                                               |
| Recent Pacing                                            | 1 (0.1)    | 246.2 (n/a)                                                                   |
| Myocarditis                                              | 4 (0.4)    | 73.0 (84.8)                                                                   |
| Troponin T antibodies                                    | 1 (0.1)    | 299.3 (n/a)                                                                   |
| <b>Multifactorial or indeterminate myocardial injury</b> |            |                                                                               |
| Pulmonary Embolism                                       | 2 (0.2)    | 114.9 (79.1)                                                                  |
| Stroke                                                   | 1 (0.1)    | 15.5 (n/a)                                                                    |
| Strenuous Exercise                                       | 1 (0.1)    | 18.0 (n/a)                                                                    |
|                                                          |            |                                                                               |
| <b>Total:</b>                                            | 30 (3.1)   | 46.2 (63.7)                                                                   |
